# Supplementary material for: Ordered mesoporous SnO2 with a highly crystalline state as an anode material for lithium ion batteries with enhanced electrochemical performance
Source: Royal Society of Chemistry journal article supplement (doi:10.1039/c3ce40087e), 2013-01-01
Supplement: c3ce40087e.pdf [file c3ce40087e.pdf]

*Supporting Information*

**Highly Crystalline Ordered Mesoporous SnO<sub>2</sub> as an Anode Material for Lithium Ion Batteries with Enhanced Electrochemical Performance**

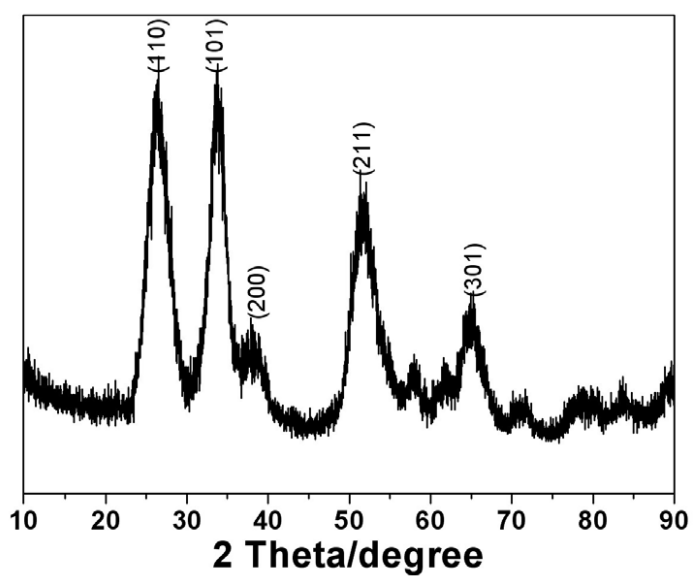

Figure S1 XRD patterns of the SnO<sub>2</sub> nanoparticles

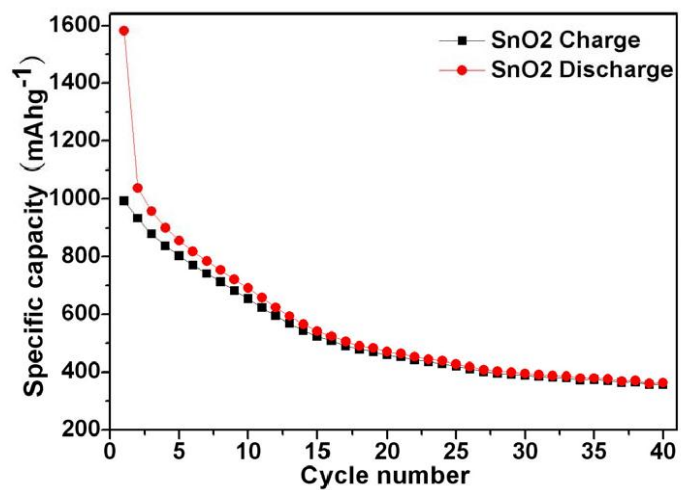

Figure S2 Lithium storage performance of SnO<sub>2</sub> nanoparticles

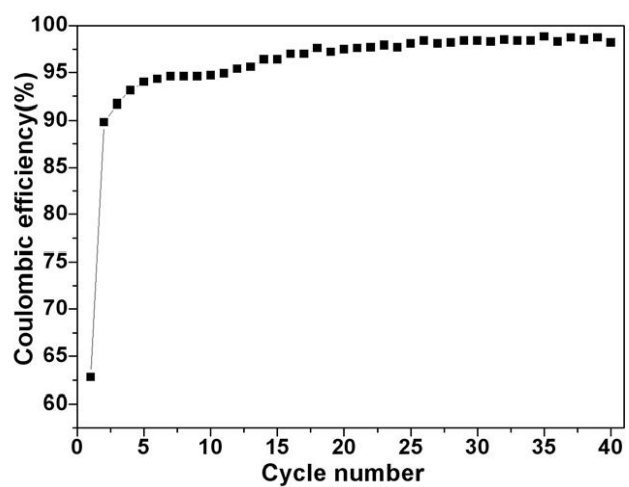

Figure S3 The coulombic efficiency of the nanoparticulate SnO<sub>2</sub> anode electrodes for lithium ion batteries.

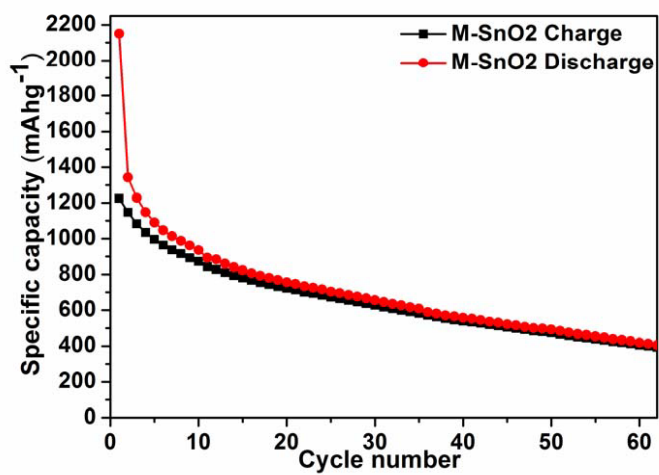

Fig. S4 Capacity vs. cycle number (0-60 cycles) curves of the ordered mesoporous SnO<sub>2</sub> electrodes.
